# Supplementary material
Source: PubMed Central journal article supplement (PMC8611384)
Supplement: 13304_2021_1171_MOESM1_ESM.pdf [file 13304_2021_1171_MOESM1_ESM.pdf]

**Quantitative assessment of the impact of COVID 19 pandemic on pancreatic surgery: an Italian multicenter analysis of 1,423 cases from 10 tertiary referral centers**

**Journal name:** Updates in Surgery

Giuseppe Quero<sup>a,b,c</sup>, MD; Nicolò Pecorelli<sup>d,e,f</sup>, MD, MSc; Salvatore Paiella<sup>g</sup>, MD; Claudio Fiorillo<sup>a,b</sup>, MD; Maria Chiara Petrone<sup>d,e,f</sup>, MD; Fausto Rosa<sup>a,b,c</sup>, MD, PhD, FACS; Giovanni Capretti<sup>h,i</sup>, MD; Vito Laterza<sup>a,b</sup>, MD; Emanuele Kauffmann<sup>j</sup>, MD; Sara Nobile<sup>g</sup>, MD; Giovanni Butturini<sup>k</sup>, MD; Giovanni Ferrari<sup>l</sup>, MD; Andrea Coratti<sup>m</sup>, MD; Riccardo Casadei<sup>n</sup>, MD; Vincenzo Mazzaferro<sup>o</sup>, MD; Ugo Boggi<sup>j\*</sup>, MD; Alessandro Zerbi<sup>h,i\*</sup>, MD; Roberto Salvia<sup>g\*</sup>, MD; Massimo Falconi<sup>d,e,f\*</sup>, MD; Sergio Alfieri<sup>a,b,c\*</sup>, MD

<sup>a</sup> Gemelli Pancreatic Center, Fondazione Policlinico Universitario “Agostino Gemelli” IRCCS; Largo Agostino Gemelli, 8, 00168, Rome (Italy)

<sup>b</sup> CRMPG (Advanced Pancreatic Research Center), Largo Agostino Gemelli, 8, 00168, Rome (Italy)

<sup>c</sup> Università Cattolica del Sacro Cuore di Roma, Largo Francesco Vito 1, 00168, Rome (Italy)

<sup>d</sup> Division of Pancreatic Surgery, Pancreas Translational & Clinical Research Center, IRCCS San Raffaele Scientific Institute, Milan, Italy

<sup>e</sup> Vita-Salute San Raffaele University, Milan Italy

<sup>f</sup> Pancreato-Biliary Endoscopy and EUS Division, Pancreas Translational & Clinical Research Center, IRCCS San Raffaele Scientific Institute, Milan, Italy

<sup>g</sup> Department of General and Pancreatic Surgery, The Pancreas Institute, University of Verona Hospital Trust, Italy

<sup>h</sup> Humanitas Clinical and Research Center – IRCCS - Rozzano (MI)

<sup>i</sup>Humanitas University, Department of Biomedical Sciences - Pieve Emanuele (MI)

<sup>j</sup>Chirurgia Generale Universitaria dell'Ospedale di Cisanello, Via Paradisa, 2, 56124 Pisa (Italy)

<sup>k</sup>Casa di Cura Pederzoli, Via Monte Baldo 24, 37019 Peschiera del Garda, Verona (Italy)

<sup>l</sup>ASST Grande Ospedale Metropolitano Niguarda, Division of Minimally-invasive Surgical Oncology, Piazza Ospedale Maggiore, 3 20162, Milan, Italy

<sup>m</sup>Division of Surgical Oncology and Robotics, Department of Oncology, Careggi University Hospital, Florence, Italy

<sup>n</sup>Department of Medical and Surgical Sciences, University of Bologna, Bologna

<sup>o</sup>HPB Surgery and Liver Transplantation, Department of Oncology, University of Milan, Milan, Italy and Istituto Nazionale Tumori, Fondazione IRCCS, Milan, Italy

**Corresponding author:**

Claudio Fiorillo, MD

Gemelli Pancreatic Center

Department of Surgery, Fondazione Policlinico Universitario "Agostino Gemelli", IRCCS

Largo Agostino Gemelli, 8

00168 Rome, Italy

tel.: +39 06 30 15 51 33

fax: +39 06 30 15 65 20

e-mail: [claudio.fiorillo@policlinicogemelli.it](mailto:claudio.fiorillo@policlinicogemelli.it)

**Online resource 1. Perioperative outcomes of comparison between semesters and by phase****General outcomes and pancreatic diseases management:**

- Demographic patients' data (age, sex, ASA score, tumor histotype);
- Number of surgical resections performed;
- Number of surgical resections per region;
- Number of discussed cases during the MDTBs;
- Modality of performance of the MDTBs (face-to-face or virtual);
- Number of neoadjuvant treatments (chemotherapy, radiotherapy and chemo-radiotherapy) of patients who underwent surgery;
- Waiting time between diagnosis and neoadjuvant treatment;
- Length of the neoadjuvant treatment

**Surgical and peri-operative outcomes**

- Number of biliary stents positioned;
- Average value of total bilirubin (mg/dl) before biliary stenting;
- Waiting time between MDTB discussion and surgical procedure;
- Number of surgical procedures for resectable, borderline and non-resectable pancreatic tumors;
- Number of associated vascular resections;
- Type of surgical approach employed (open, laparoscopic, robot-assisted);
- 30-day post-operative mortality;
- Number of accesses to ICU after surgery;
- Length of hospital stay;
- Numbers of adjuvant treatments;
- Waiting time between surgery and adjuvant treatment

ASA: American Society of Anesthesiologists; MDTB: multidisciplinary tumor board; ICU: intensive care unit
