# Supplementary material
Source: PubMed Central journal article supplement (PMC8611384)
Supplement: 13304_2021_1171_MOESM2_ESM.pdf [file 13304_2021_1171_MOESM2_ESM.pdf]

**Quantitative assessment of the impact of COVID 19 pandemic on pancreatic surgery: an Italian multicenter analysis of 1,423 cases from 10 tertiary referral centers**

**Journal name:** Updates in Surgery

Giuseppe Quero<sup>a,b,c</sup>, MD; Nicolò Pecorelli<sup>d,e,f</sup>, MD, MSc; Salvatore Paiella<sup>g</sup>, MD; Claudio Fiorillo<sup>a,b</sup>, MD; Maria Chiara Petrone<sup>d,e,f</sup>, MD; Fausto Rosa<sup>a,b,c</sup>, MD, PhD, FACS; Giovanni Capretti<sup>h,i</sup>, MD; Vito Laterza<sup>a,b</sup>, MD; Emanuele Kauffmann<sup>j</sup>, MD; Sara Nobile<sup>g</sup>, MD; Giovanni Butturini<sup>k</sup>, MD; Giovanni Ferrari<sup>l</sup>, MD; Andrea Coratti<sup>m</sup>, MD; Riccardo Casadei<sup>n</sup>, MD; Vincenzo Mazzaferro<sup>o</sup>, MD; Ugo Boggi<sup>j\*</sup>, MD; Alessandro Zerbi<sup>h,i\*</sup>, MD; Roberto Salvia<sup>g\*</sup>, MD; Massimo Falconi<sup>d,e,f\*</sup>, MD; Sergio Alfieri<sup>a,b,c\*</sup>, MD

<sup>a</sup> Gemelli Pancreatic Center, Fondazione Policlinico Universitario “Agostino Gemelli” IRCCS; Largo Agostino Gemelli, 8, 00168, Rome (Italy)

<sup>b</sup> CRMPG (Advanced Pancreatic Research Center), Largo Agostino Gemelli, 8, 00168, Rome (Italy)

<sup>c</sup> Università Cattolica del Sacro Cuore di Roma, Largo Francesco Vito 1, 00168, Rome (Italy)

<sup>d</sup> Division of Pancreatic Surgery, Pancreas Translational & Clinical Research Center, IRCCS San Raffaele Scientific Institute, Milan, Italy

<sup>e</sup> Vita-Salute San Raffaele University, Milan Italy

<sup>f</sup> Pancreato-Biliary Endoscopy and EUS Division, Pancreas Translational & Clinical Research Center, IRCCS San Raffaele Scientific Institute, Milan, Italy

<sup>g</sup> Department of General and Pancreatic Surgery, The Pancreas Institute, University of Verona Hospital Trust, Italy

<sup>h</sup> Humanitas Clinical and Research Center – IRCCS - Rozzano (MI)

<sup>i</sup>Humanitas University, Department of Biomedical Sciences - Pieve Emanuele (MI)

<sup>j</sup>Chirurgia Generale Universitaria dell'Ospedale di Cisanello, Via Paradisa, 2, 56124 Pisa (Italy)

<sup>k</sup>Casa di Cura Pederzoli, Via Monte Baldo 24, 37019 Peschiera del Garda, Verona (Italy)

<sup>l</sup>ASST Grande Ospedale Metropolitano Niguarda, Division of Minimally-invasive Surgical Oncology, Piazza Ospedale Maggiore, 3 20162, Milan, Italy

<sup>m</sup>Division of Surgical Oncology and Robotics, Department of Oncology, Careggi University Hospital, Florence, Italy

<sup>n</sup>Department of Medical and Surgical Sciences, University of Bologna, Bologna

<sup>o</sup>HPB Surgery and Liver Transplantation, Department of Oncology, University of Milan, Milan, Italy and Istituto Nazionale Tumori, Fondazione IRCCS, Milan, Italy

**Corresponding author:**

Claudio Fiorillo, MD

Gemelli Pancreatic Center

Department of Surgery, Fondazione Policlinico Universitario "Agostino Gemelli", IRCCS

Largo Agostino Gemelli, 8

00168 Rome, Italy

tel.: +39 06 30 15 51 33

fax: +39 06 30 15 65 20

e-mail: [claudio.fiorillo@policlinicogemelli.it](mailto:claudio.fiorillo@policlinicogemelli.it)

**Online resource 2. COVID-19 positive cases, related mortality and number of surgical procedures in 2020 per region and period of analysis**

|                                                 | <b>Phase 0</b> | <b>Phase 1</b>   | <b>Phase 2</b>   | <b>Phase 3</b>   |
|-------------------------------------------------|----------------|------------------|------------------|------------------|
| <b>Italy</b>                                    |                |                  |                  |                  |
| Population: 59,991,186                          |                |                  |                  |                  |
| <i>N. of positive cases (deaths)</i>            | 7,375 (366)    | 210,717 (28,884) | 236,989 (34,345) | 240,578 (34,767) |
| <b>Veneto</b>                                   |                |                  |                  |                  |
| Population: 4,862,682                           |                |                  |                  |                  |
| <i>N. of positive cases (deaths)</i>            | 670 (18)       | 18,318 (1,516)   | 19,219 (1,978)   | 19,286 (2,012)   |
| <i>N. of surgical procedures (n=244), n (%)</i> | 121 (49.6)     | 45 (18.4)        | 55 (22.6)        | 23 (9.4)         |
| <b>Lombardy</b>                                 |                |                  |                  |                  |
| Population: 10,060,574                          |                |                  |                  |                  |
| <i>N. of positive cases (deaths)</i>            | 4,189 (267)    | 77,528 (14,231)  | 91,658 (16,449)  | 93,901 (16,644)  |
| <i>N. of surgical procedures (n=228), n (%)</i> | 103 (45.2)     | 45 (19.7)        | 56 (24.6)        | 24 (10.5)        |
| <b>Tuscany</b>                                  |                |                  |                  |                  |
| Population: 3,676,116                           |                |                  |                  |                  |
| <i>N. of positive cases (deaths)</i>            | 166 (0)        | 9,563 (872)      | 10,180 (1,085)   | 10,250 (1,104)   |
| <i>N. of surgical procedures (n=79), n (%)</i>  | 28 (35.5)      | 23 (29.1)        | 23 (29.1)        | 5 (6.3)          |
| <b>Latium</b>                                   |                |                  |                  |                  |
| Population: 5,730,588                           |                |                  |                  |                  |
| <i>N. of positive cases (deaths)</i>            | 87 (3)         | 6,809 (508)      | 7,955 (808)      | 8,110 (837)      |
| <i>N. of surgical procedures (n=55), n (%)</i>  | 14 (25.4)      | 22 (40)          | 15 (27.3)        | 4 (7.3)          |
| <b>Emilia-Romagna</b>                           |                |                  |                  |                  |
| Population: 4,474,292                           |                |                  |                  |                  |
| <i>N. of positive cases (deaths)</i>            | 1,180 (56)     | 26,016 (3,642)   | 28,073 (4,204)   | 28,492 (4,260)   |
| <i>N. of surgical procedures (n=32), n (%)</i>  | 13 (40.6)      | 13 (40.6)        | 4 (12.5)         | 2 (6.3)          |
