# Supplementary material
Source: PubMed Central journal article supplement (PMC8611384)
Supplement: 13304_2021_1171_MOESM3_ESM.pdf [file 13304_2021_1171_MOESM3_ESM.pdf]

**Quantitative assessment of the impact of COVID 19 pandemic on pancreatic surgery: an Italian multicenter analysis of 1,423 cases from 10 tertiary referral centers**

**Journal name:** Updates in Surgery

Giuseppe Quero<sup>a,b,c</sup>, MD; Nicolò Pecorelli<sup>d,e,f</sup>, MD, MSc; Salvatore Paiella<sup>g</sup>, MD; Claudio Fiorillo<sup>a,b</sup>, MD; Maria Chiara Petrone<sup>d,e,f</sup>, MD; Fausto Rosa<sup>a,b,c</sup>, MD, PhD, FACS; Giovanni Capretti<sup>h,i</sup>, MD; Vito Laterza<sup>a,b</sup>, MD; Emanuele Kauffmann<sup>j</sup>, MD; Sara Nobile<sup>g</sup>, MD; Giovanni Butturini<sup>k</sup>, MD; Giovanni Ferrari<sup>l</sup>, MD; Andrea Coratti<sup>m</sup>, MD; Riccardo Casadei<sup>n</sup>, MD; Vincenzo Mazzaferro<sup>o</sup>, MD; Ugo Boggi<sup>j\*</sup>, MD; Alessandro Zerbi<sup>h,i\*</sup>, MD; Roberto Salvia<sup>g\*</sup>, MD; Massimo Falconi<sup>d,e,f\*</sup>, MD; Sergio Alfieri<sup>a,b,c\*</sup>, MD

<sup>a</sup> Gemelli Pancreatic Center, Fondazione Policlinico Universitario “Agostino Gemelli” IRCCS; Largo Agostino Gemelli, 8, 00168, Rome (Italy)

<sup>b</sup> CRMPG (Advanced Pancreatic Research Center), Largo Agostino Gemelli, 8, 00168, Rome (Italy)

<sup>c</sup> Università Cattolica del Sacro Cuore di Roma, Largo Francesco Vito 1, 00168, Rome (Italy)

<sup>d</sup> Division of Pancreatic Surgery, Pancreas Translational & Clinical Research Center, IRCCS San Raffaele Scientific Institute, Milan, Italy

<sup>e</sup> Vita-Salute San Raffaele University, Milan Italy

<sup>f</sup> Pancreato-Biliary Endoscopy and EUS Division, Pancreas Translational & Clinical Research Center, IRCCS San Raffaele Scientific Institute, Milan, Italy

<sup>g</sup> Department of General and Pancreatic Surgery, The Pancreas Institute, University of Verona Hospital Trust, Italy

<sup>h</sup> Humanitas Clinical and Research Center – IRCCS - Rozzano (MI)

<sup>i</sup>Humanitas University, Department of Biomedical Sciences - Pieve Emanuele (MI)

<sup>j</sup>Chirurgia Generale Universitaria dell'Ospedale di Cisanello, Via Paradisa, 2, 56124 Pisa (Italy)

<sup>k</sup>Casa di Cura Pederzoli, Via Monte Baldo 24, 37019 Peschiera del Garda, Verona (Italy)

<sup>l</sup>ASST Grande Ospedale Metropolitano Niguarda, Division of Minimally-invasive Surgical Oncology, Piazza Ospedale Maggiore, 3 20162, Milan, Italy

<sup>m</sup>Division of Surgical Oncology and Robotics, Department of Oncology, Careggi University Hospital, Florence, Italy

<sup>n</sup>Department of Medical and Surgical Sciences, University of Bologna, Bologna

<sup>o</sup>HPB Surgery and Liver Transplantation, Department of Oncology, University of Milan, Milan, Italy and Istituto Nazionale Tumori, Fondazione IRCCS, Milan, Italy

**Corresponding author:**

Claudio Fiorillo, MD

Gemelli Pancreatic Center

Department of Surgery, Fondazione Policlinico Universitario "Agostino Gemelli", IRCCS

Largo Agostino Gemelli, 8

00168 Rome, Italy

tel.: +39 06 30 15 51 33

fax: +39 06 30 15 65 20

e-mail: [claudio.fiorillo@policlinicogemelli.it](mailto:claudio.fiorillo@policlinicogemelli.it)

**Online resource 3. Region of origin of patients who underwent pancreatic surgery in the 10 referral centers of the study**

| <b>N (%)</b>                         | <b>Semester 2019</b> | <b>Semester 2020</b> | <b>p</b>     | <b>Phase 0 2019</b> | <b>Phase 0 2020</b> | <b>p</b>    | <b>Phase 1 2019</b> | <b>Phase 1 2020</b> | <b>p</b>     | <b>Phase 2 2019</b> | <b>Phase 2 2020</b> | <b>p</b>    | <b>Phase 3 2019</b> | <b>Phase 3 2020</b> | <b>p</b>    |
|--------------------------------------|----------------------|----------------------|--------------|---------------------|---------------------|-------------|---------------------|---------------------|--------------|---------------------|---------------------|-------------|---------------------|---------------------|-------------|
| <b>Veneto</b>                        |                      |                      |              |                     |                     |             |                     |                     |              |                     |                     |             |                     |                     |             |
| <i>Patients from Veneto</i>          | 45 (14.3)            | 52 (21.4)            | <b>0.02</b>  | 16 (13)             | 19 (15.7)           | 0.5         | 14 (14)             | 16 (36.4)           | <b>0.002</b> | 12 (16.7)           | 13 (23.6)           | 0.32        | 3 (15)              | 4 (17.4)            | 0.83        |
| <i>Patients from out of Veneto</i>   | 270 (85.7)           | 191 (78.6)           |              | 107 (87)            | 102 (84.3)          |             | 86 (86)             | 28 (63.6)           |              | 60 (83.3)           | 42 (76.4)           |             | 17 (85)             | 19 (82.6)           |             |
| <b>Lombardy</b>                      |                      |                      |              |                     |                     |             |                     |                     |              |                     |                     |             |                     |                     |             |
| <i>Patients from Lombardy</i>        | 162 (52.9)           | 148 (64.9)           | <b>0.006</b> | 74 (64.3)           | 69 (67)             | 0.68        | 38 (45.8)           | 27 (60)             | 0.12         | 43 (50)             | 37 (66.1)           | <b>0.05</b> | 7 (31.8)            | 15 (62.5)           | <b>0.03</b> |
| <i>Patients from out of Lombardy</i> | 144 (47.1)           | 80 (35.1)            |              | 41 (35.7)           | 34 (33)             |             | 45 (54.2)           | 18 (40)             |              | 43 (50)             | 19 (33.9)           |             | 15 (68.2)           | 9 (37.5)            |             |
| <b>Tuscany</b>                       |                      |                      |              |                     |                     |             |                     |                     |              |                     |                     |             |                     |                     |             |
| <i>Patients from Tuscany</i>         | 61 (73.5)            | 59 (75.6)            | 0.75         | 24 (75)             | 20 (74.1)           | 0.93        | 13 (65)             | 19 (82.6)           | 0.19         | 20 (83.3)           | 16 (69.6)           | 0.3         | 4 (57.1)            | 4 (80)              | 0.4         |
| <i>Patients from out of Tuscany</i>  | 22 (26.5)            | 19 (24.4)            |              | 8 (25)              | 7 (25.9)            |             | 7 (35)              | 4 (17.4)            |              | 4 (16.7)            | 7 (30.4)            |             | 3 (42.9)            | 1 (20)              |             |
| <b>Latium</b>                        |                      |                      |              |                     |                     |             |                     |                     |              |                     |                     |             |                     |                     |             |
| <i>Patients from Latium</i>          | 21 (43.8)            | 39 (70.9)            | <b>0.005</b> | 9 (39.1)            | 11 (78.6)           | <b>0.02</b> | 4 (30.8)            | 15 (68.2)           | <b>0.03</b>  | 8 (72.7)            | 10 (66.7)           | 0.74        | 0                   | 3 (75)              | 0.17        |
| <i>Patients from out of Latium</i>   | 27 (56.3)            | 16 (29.1)            |              | 14 (60.9)           | 3 (21.4)            |             | 9 (69.2)            | 7 (31.8)            |              | 3 (27.3)            | 5 (33.3)            |             | 1 (100)             | 1 (25)              |             |
| <b>Emilia-Romagna</b>                |                      |                      |              |                     |                     |             |                     |                     |              |                     |                     |             |                     |                     |             |
| <i>Patients from Emilia-Romagna</i>  | 23 (71.9)            | 23 (71.9)            | 1            | 10 (71.4)           | 11 (84.6)           | 0.4         | 6 (75)              | 9 (69.2)            | 0.77         | 6 (25)              | 1 (25)              | 0.09        | 1 (50)              | 2 (100)             | 0.24        |

|                                                  |          |          |  |          |          |  |        |          |  |        |        |  |        |   |  |
|--------------------------------------------------|----------|----------|--|----------|----------|--|--------|----------|--|--------|--------|--|--------|---|--|
| <i>Patients from<br/>out Emilia-<br/>Romagna</i> | 9 (28.1) | 9 (28.1) |  | 4 (28.6) | 2 (15.4) |  | 2 (25) | 4 (30.8) |  | 2 (25) | 3 (75) |  | 1 (50) | 0 |  |
|--------------------------------------------------|----------|----------|--|----------|----------|--|--------|----------|--|--------|--------|--|--------|---|--|
