# Supplementary material
Source: PubMed Central journal article supplement (PMC8611384)
Supplement: 13304_2021_1171_MOESM4_ESM.pdf [file 13304_2021_1171_MOESM4_ESM.pdf]

**Quantitative assessment of the impact of COVID 19 pandemic on pancreatic surgery: an Italian multicenter analysis of 1,423 cases from 10 tertiary referral centers**

**Journal name:** Updates in Surgery

Giuseppe Quero<sup>a,b,c</sup>, MD; Nicolò Pecorelli<sup>d,e,f</sup>, MD, MSc; Salvatore Paiella<sup>g</sup>, MD; Claudio Fiorillo<sup>a,b</sup>, MD; Maria Chiara Petrone<sup>d,e,f</sup>, MD; Fausto Rosa<sup>a,b,c</sup>, MD, PhD, FACS; Giovanni Capretti<sup>h,i</sup>, MD; Vito Laterza<sup>a,b</sup>, MD; Emanuele Kauffmann<sup>j</sup>, MD; Sara Nobile<sup>g</sup>, MD; Giovanni Butturini<sup>k</sup>, MD; Giovanni Ferrari<sup>l</sup>, MD; Andrea Coratti<sup>m</sup>, MD; Riccardo Casadei<sup>n</sup>, MD; Vincenzo Mazzaferro<sup>o</sup>, MD; Ugo Boggi<sup>j\*</sup>, MD; Alessandro Zerbi<sup>h,i\*</sup>, MD; Roberto Salvia<sup>g\*</sup>, MD; Massimo Falconi<sup>d,e,f\*</sup>, MD; Sergio Alfieri<sup>a,b,c\*</sup>, MD

<sup>a</sup> Gemelli Pancreatic Center, Fondazione Policlinico Universitario “Agostino Gemelli” IRCCS; Largo Agostino Gemelli, 8, 00168, Rome (Italy)

<sup>b</sup> CRMPG (Advanced Pancreatic Research Center), Largo Agostino Gemelli, 8, 00168, Rome (Italy)

<sup>c</sup> Università Cattolica del Sacro Cuore di Roma, Largo Francesco Vito 1, 00168, Rome (Italy)

<sup>d</sup> Division of Pancreatic Surgery, Pancreas Translational & Clinical Research Center, IRCCS San Raffaele Scientific Institute, Milan, Italy

<sup>e</sup> Vita-Salute San Raffaele University, Milan Italy

<sup>f</sup> Pancreato-Biliary Endoscopy and EUS Division, Pancreas Translational & Clinical Research Center, IRCCS San Raffaele Scientific Institute, Milan, Italy

<sup>g</sup> Department of General and Pancreatic Surgery, The Pancreas Institute, University of Verona Hospital Trust, Italy

<sup>h</sup> Humanitas Clinical and Research Center – IRCCS - Rozzano (MI)

<sup>i</sup>Humanitas University, Department of Biomedical Sciences - Pieve Emanuele (MI)

<sup>j</sup>Chirurgia Generale Universitaria dell'Ospedale di Cisanello, Via Paradisa, 2, 56124 Pisa (Italy)

<sup>k</sup>Casa di Cura Pederzoli, Via Monte Baldo 24, 37019 Peschiera del Garda, Verona (Italy)

<sup>l</sup>ASST Grande Ospedale Metropolitano Niguarda, Division of Minimally-invasive Surgical Oncology, Piazza Ospedale Maggiore, 3 20162, Milan, Italy

<sup>m</sup>Division of Surgical Oncology and Robotics, Department of Oncology, Careggi University Hospital, Florence, Italy

<sup>n</sup>Department of Medical and Surgical Sciences, University of Bologna, Bologna

<sup>o</sup>HPB Surgery and Liver Transplantation, Department of Oncology, University of Milan, Milan, Italy and Istituto Nazionale Tumori, Fondazione IRCCS, Milan, Italy

**Corresponding author:**

Claudio Fiorillo, MD

Gemelli Pancreatic Center

Department of Surgery, Fondazione Policlinico Universitario "Agostino Gemelli", IRCCS

Largo Agostino Gemelli, 8

00168 Rome, Italy

tel.: +39 06 30 15 51 33

fax: +39 06 30 15 65 20

e-mail: [claudio.fiorillo@policlinicogemelli.it](mailto:claudio.fiorillo@policlinicogemelli.it)

| <b>Online resource 4. Pancreatic diseases treated during the two semesters of analysis</b> |                                                         |                                                         |                   |
|--------------------------------------------------------------------------------------------|---------------------------------------------------------|---------------------------------------------------------|-------------------|
|                                                                                            | <b>1<sup>st</sup> January-30<sup>th</sup> June 2019</b> | <b>1<sup>st</sup> January-30<sup>th</sup> June 2020</b> | <b>p</b>          |
| <b>Histotype, n (%)</b>                                                                    |                                                         |                                                         |                   |
| <i>Ductal adenocarcinoma</i>                                                               | 414 (52.7)                                              | 375 (58.7)                                              | 0.16              |
| <i>Ductal-mucinous adenocarcinoma</i>                                                      | 1 (0.1)                                                 | 1 (0.2)                                                 | 1                 |
| <i>Ductal-squamous adenocarcinoma</i>                                                      | 2 (0.2)                                                 | 4 (0.6)                                                 | 0.41              |
| <i>Undifferentiated carcinoma</i>                                                          | 5 (0.6)                                                 | 1 (0.2)                                                 | 0.1               |
| <i>Undifferentiated carcinoma with osteoclast-like giant cells</i>                         | 0                                                       | 1 (0.2)                                                 | -                 |
| <i>Acinar cell carcinoma</i>                                                               | 3 (0.4)                                                 | 1 (0.2)                                                 | 0.31              |
| <i>Pancreatoblastoma</i>                                                                   | 1 (0.1)                                                 | 0                                                       | -                 |
| <i>Solid pseudopapillary neoplasms</i>                                                     | 11 (1.4)                                                | 10 (1.6)                                                | 0.82              |
| <i>Ampullary adenocarcinoma</i>                                                            | 61 (7.8)                                                | 38 (5.9)                                                | <b>0.02</b>       |
| <i>Cholangiocarcinoma</i>                                                                  | 25 (3.2)                                                | 30 (4.7)                                                | 0.5               |
| <i>Deuodenal adenocarcinoma</i>                                                            | 7 (0.9)                                                 | 7 (1)                                                   | 1                 |
| <i>Pancreatic metastases</i>                                                               | 15 (1.9)                                                | 12 (1.9)                                                | 0.56              |
| <i>Dysplasia</i>                                                                           | 1 (0.1)                                                 | 3 (0.5)                                                 | 0.31              |
| <i>IPMN</i>                                                                                | 67 (8.5)                                                | 29 (4.5)                                                | <b>&lt;0.0001</b> |
| <i>IPMC</i>                                                                                | 7 (0.9)                                                 | 6 (0.9)                                                 | 0.78              |
| <i>Pancreatic neuroendocrine neoplasms (G1, G2,G3,)</i>                                    | 96 (12.2)                                               | 67 (10.5)                                               | <b>0.02</b>       |
| <i>Pancreatic neuroendocrine carcinoma</i>                                                 | 2 (0.2)                                                 | 0                                                       |                   |
| <i>Mixed neuroendocrine-non-neuroendocrine neoplasms</i>                                   | 4 (0.5)                                                 | 2 (0.3)                                                 | 0.41              |
| <i>Ampullary neuroendocrine neoplasms</i>                                                  | 2 (0.2)                                                 | 0                                                       | -                 |
| <i>Nesidioblastosis</i>                                                                    | 0                                                       | 1 (0.2)                                                 | -                 |
| <i>Inflammatory diseases</i>                                                               | 8 (1)                                                   | 15 (2.3)                                                | 0.14              |
| <i>Pancreatic cyst</i>                                                                     | 4 (0.5)                                                 | 0                                                       | -                 |
| <i>Serous cystadenoma</i>                                                                  | 12 (1.5)                                                | 5 (0.8)                                                 | 0.09              |
| <i>Serous cystadenocarcinoma</i>                                                           | 0                                                       | 1 (0.2)                                                 | -                 |
| <i>Mucinous cystadenoma</i>                                                                | 22 (2.8)                                                | 19 (2.9)                                                | 0.63              |
| <i>GIST</i>                                                                                | 5 (0.6)                                                 | 4 (0.6)                                                 | 0.73              |
| <i>Heterotopic lesions</i>                                                                 | 3 (0.4)                                                 | 1 (0.2)                                                 | 0.31              |
| <i>Duodenal benign lesions</i>                                                             | 4 (0.5)                                                 | 2 (0.3)                                                 | 0.41              |
| <i>Benign mesenchymal lesions</i>                                                          | 1 (0.1)                                                 | 1 (0.2)                                                 | 1                 |

|                                      |         |         |   |
|--------------------------------------|---------|---------|---|
| <i>Malignant mesenchymal lesions</i> | 0       | 1 (0.2) | - |
| <i>Lymphatic benign lesions</i>      | 1 (0.1) | 1 (0.2) | 1 |
| <i>Lymphatic malignant lesions</i>   | 1 (0.1) | 0       | - |
